# Supplementary material for: Lathosterol Oxidase (Sterol C-5 Desaturase) Deletion Confers Resistance to Amphotericin B and Sensitivity to Acidic Stress in Leishmania major
Source: PubMed Central journal article supplement (PMC7333571; doi:10.1128/msphere.00380-20), 2020-07-01

**WT**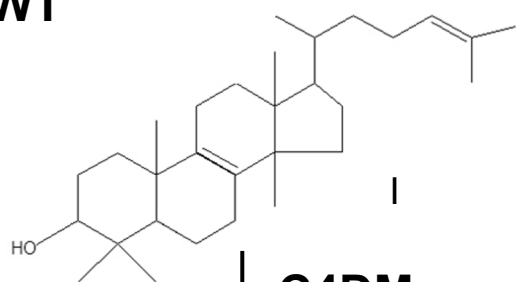

↓  
 C4DM,  
 C14DM

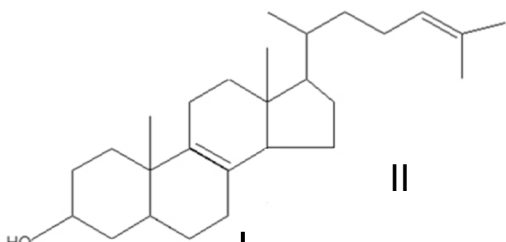

↓ **SMT**

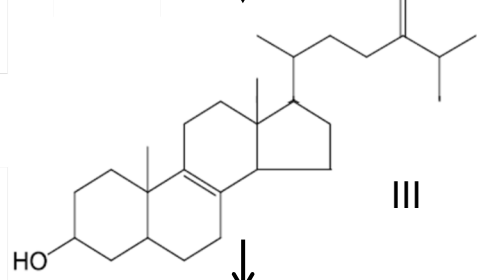

↓

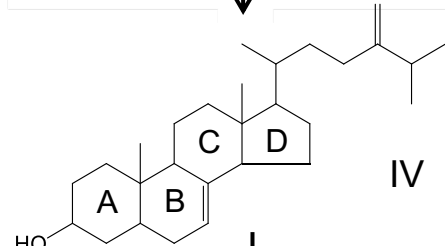

NADPH, H<sup>+</sup>, O<sub>2</sub>  
 ↓ **LSO**

2 H<sub>2</sub>O, NADP<sup>+</sup>

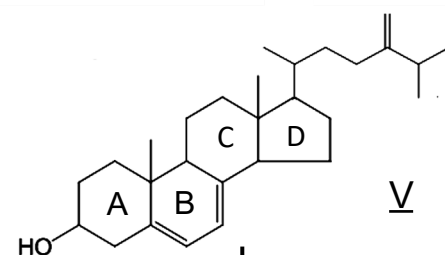

↓

↓

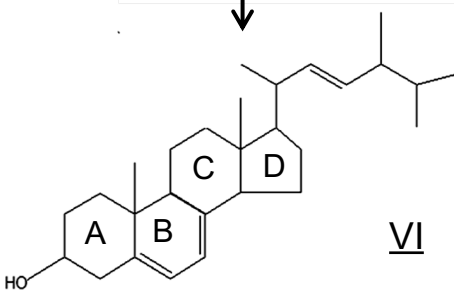**Lso<sup>-</sup>**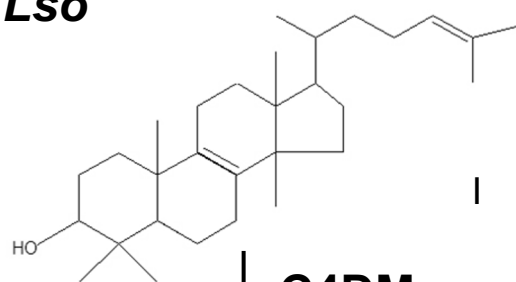

↓  
 C4DM,  
 C14DM

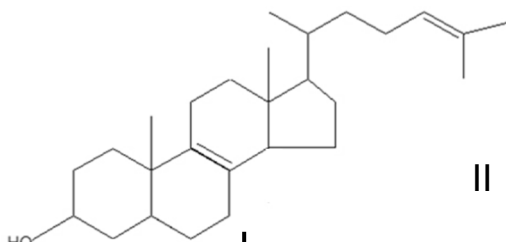

↓ **SMT**

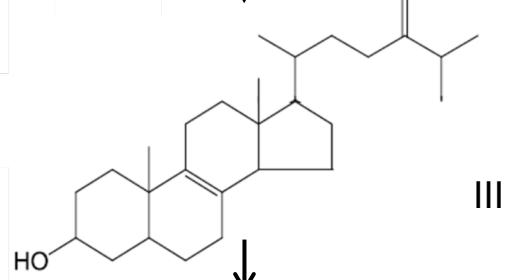

↓

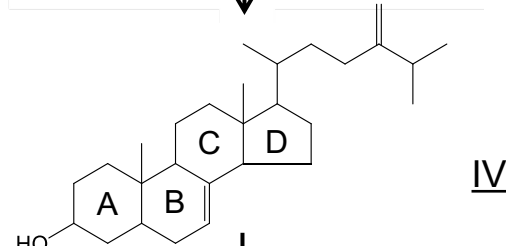

↓  
 ↓

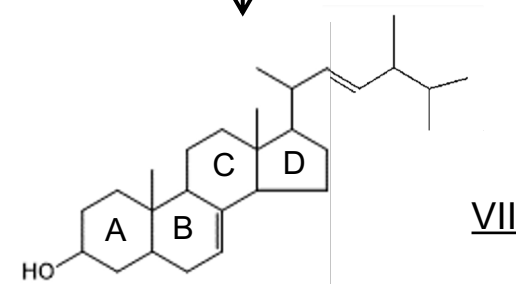

Supplement: mSphere.00380-20-sf001.pdf [file mSphere.00380-20-sf001.pdf]
