# Supplementary material for: Lathosterol Oxidase (Sterol C-5 Desaturase) Deletion Confers Resistance to Amphotericin B and Sensitivity to Acidic Stress in Leishmania major
Source: PubMed Central journal article supplement (PMC7333571; doi:10.1128/msphere.00380-20), 2020-07-01

**A**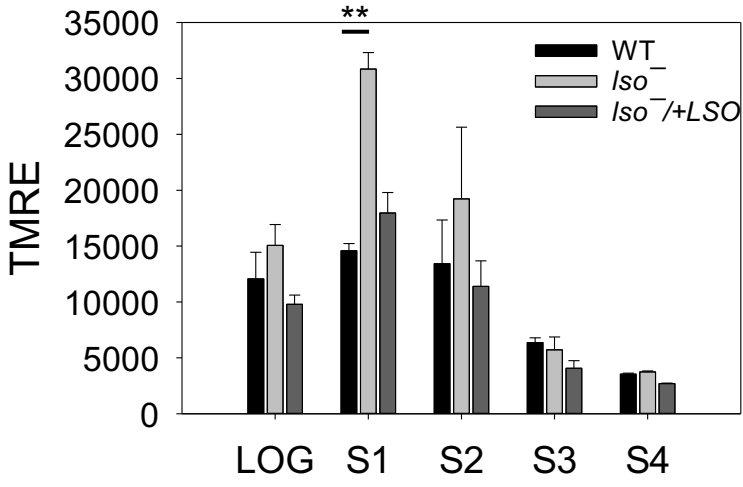**B**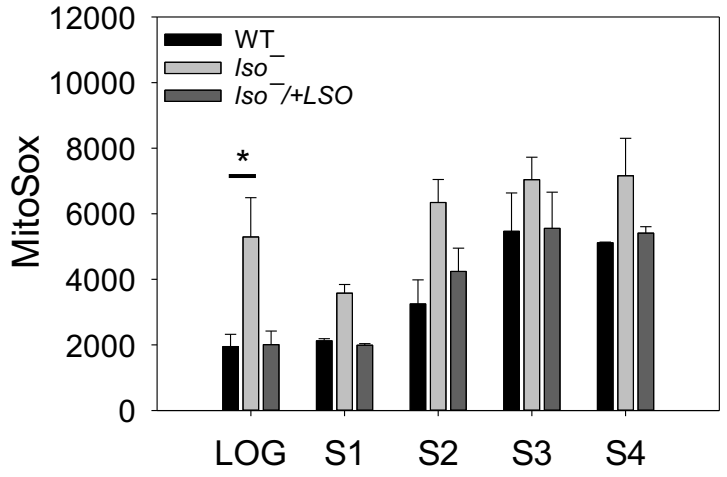**C**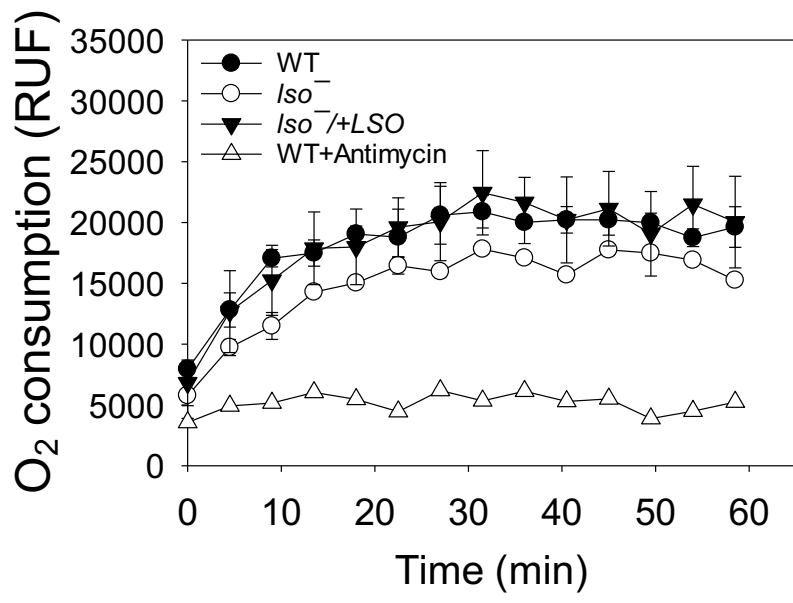

Supplement: mSphere.00380-20-sf004.pdf [file mSphere.00380-20-sf004.pdf]
