# Supplementary material for: Lathosterol Oxidase (Sterol C-5 Desaturase) Deletion Confers Resistance to Amphotericin B and Sensitivity to Acidic Stress in Leishmania major
Source: PubMed Central journal article supplement (PMC7333571; doi:10.1128/msphere.00380-20), 2020-07-01
Supplement: mSphere.00380-20-st001.pdf [file mSphere.00380-20-st001.pdf]

**Table S1. List of oligonucleotides used in this study.**

| Primer # | Name                    | Purpose                                     | Sequence                                        |
|----------|-------------------------|---------------------------------------------|-------------------------------------------------|
| 645      | LSO-5'UTR-F-EcoRI       | To amplify the 5'-flanking sequence         | CATGATgaattcCACTGTACGTCGGCTCGTG                 |
| 646      | LSO-5'UTR-R-SpeI        | To amplify the 5'-flanking sequence         | GTCGCTactagtGCTTTCGAATGAGCCGGTG                 |
| 647      | LSO-3'UTR-F-SpeI-BglII  | To amplify the 3'-flanking sequence         | CGGACGactagtGGCTAGagatctGAGAAGGATCGGTCACCTTATTG |
| 659      | LSO-3'UTR-rev (HindIII) | To amplify the 3'-flanking sequence         | GGCAGCaagcttCCTACGTACTTACTCGCAC                 |
| 649      | LSO-ORF-F-BamHI         | To amplify the <i>LSO</i> ORF               | TCAGTAggatccACCATGGACTTCGCCTTTCGCC              |
| 650      | LSO-ORF-R-BamHI         | To amplify the <i>LSO</i> ORF               | GCACTggatccTTATGCGCCGACCTTCTTTGAGC              |
| 651      | LSO-GFP-R-EcoRV         | To generate the <i>LSO-GFP</i> fusion       | GATGCTgatataTGCGCCGACCTTCTTTGAGC                |
| 653      | LSO-Probe 1-F           | To generate the LSO probe for Southern blot | GAGTAACCGAGTCGGTTGTC                            |
| 654      | LSO-Probe 1-R           | To generate the LSO probe for Southern blot | GTGAGAAGTGTCTCGACG                              |
| 655      | LSO-Probe 2-F           | To generate the LSO probe for Southern blot | CTCTTCGCCTCCATCTCCTAC                           |
| 660      | LSO-Probe 2-R           | To generate the LSO probe for Southern blot | GATCGCCAGAAGTTCACCAC                            |
| 848      | SCGs-F                  | For qRT-PCR analysis of SCGs                | GAGGAGAACAATGTGCCAG                             |
| 849      | SCGs-R                  | For qRT-PCR analysis of SCGs                | CCGCAGTGCCTCTGAGAG                              |
| 709      | 28S rRNA-F              | For qRT-PCR analysis of 28S rRNA            | AAGATGGACCGGCCTCTAGT                            |
| 710      | 28S rRNA-R              | For qRT-PCR analysis of 28S rRNA            | ATCCTTCCCCGCTCCAGTAT                            |
